# Supplementary material for: Bacterial–host adhesion dominated by collagen subtypes remodelled by osmotic pressure
Source: PubMed Central journal article supplement — NPJ Biofilms Microbiomes. 2024 Nov 12;10:124. doi: 10.1038/s41522-024-00600-x (PMC11557999; doi:10.1038/s41522-024-00600-x), 2024-11-12
Supplement: 41522_2024_600_MOESM1_ESM.pdf [file 41522_2024_600_MOESM1_ESM.pdf]

Supplementary information for

## **Bacterial–host adhesion dominated by collagen subtypes remodelled by osmotic pressure**

Hongwei Xu,<sup>a</sup> Yuting Feng,<sup>a</sup> Yongtao Du,<sup>b,c</sup> Yiming Han,<sup>a</sup> Xiaocen Duan,<sup>a</sup> Ying Jiang,<sup>a,d</sup> Liya Su,<sup>e</sup> Xiaozhi Liu,<sup>f,g</sup> Siying Qin,<sup>h</sup> Kangmin He,<sup>b,c</sup> and Jianyong Huang<sup>a,\*</sup>

<sup>a</sup> Department of Mechanics and Engineering Science, College of Engineering,  
Peking University, Beijing 100871, China.

<sup>b</sup> State Key Laboratory of Molecular Developmental Biology, Institute of Genetics  
and Developmental Biology, Chinese Academy of Sciences, Beijing 100101,  
China

<sup>c</sup> College of Advanced Agricultural Sciences, University of Chinese Academy of  
Sciences, Beijing 100049, China

<sup>d</sup> Nanchang Innovation Institute of Peking University, Nanchang 330096, China

<sup>e</sup> Clinical Medical Research Center of the Affiliated Hospital, Inner Mongolia  
Medical University, Inner Mongolia Key Laboratory of Medical Cell Biology, Hohhot  
010050, Inner Mongolia, China

<sup>f</sup> Tianjin Key Laboratory of Epigenetics for Organ Development of Premature Infants,  
Fifth Central Hospital of Tianjin, Tianjin 300450, China.

<sup>g</sup> High Altitude Characteristic Medical Research Institute, Huangnan Tibetan  
Autonomous Prefecture People's Hospital, Huangnan Prefecture, Qinghai Province  
811399, China

<sup>h</sup> School of Life Sciences, Peking University, 100871 Beijing, China

\*Correspondence should be addressed to Jianyong Huang, Email: [jyhuang@pku.edu.cn](mailto:jyhuang@pku.edu.cn)

**This PDF file includes:**

Supplementary Figure 1 to 15

Supplementary Tables 1 to 8

**Other Supplementary Materials for this manuscript include the following:**

Supplementary Movie 1

Supplementary Data 1

**Supplementary Text**

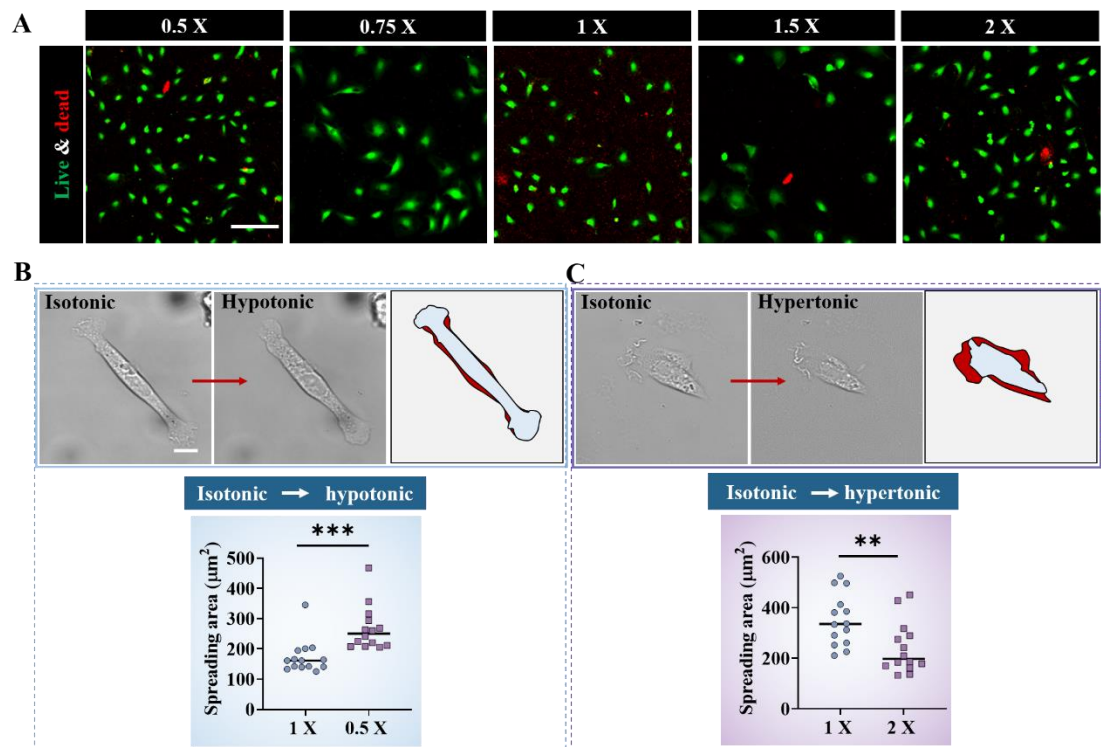

**Supplementary Figure 1.** Cytotoxicity assay and morphological changes under osmotic stresses. (A) Results of live/dead staining after IEC-6 cells were exposed to hypotonic (0.5X and 0.75X), isotonic (1X), and hypertonic (1.5X and 2X) solutions for 3 h, where green denoted the live cells whereas red indicated the dead ones. Scale bar: 100  $\mu\text{m}$ . (B) and (C) changes in cell morphology after 3 min of hypotonic and hypertonic stimulation. The spreading areas of the cells were quantified via the software of ImageJ. Scale bar: 10  $\mu\text{m}$ . At least three independent experiments were carried out for each condition. Two-sided unpaired t test was used for statistical analysis. \*\*and\*\*\* indicated  $P < 0.01$  and  $P < 0.001$ , respectively.

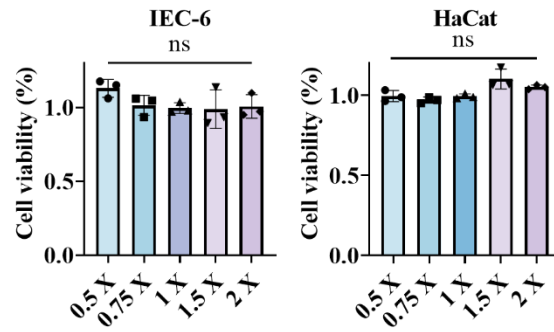

**Supplementary Figure 2.** Cytotoxicity tests of IEC-6 cells (A) and HaCat cells (B) under different osmotic pressure conditions quantified through the CCK8 assay (n=3). The CCK8 assay was performed after exposing cells to the hypotonic (0.5X and 0.75X), isotonic (1X), and hypertonic (1.5X and 2X) solutions for 3 h, respectively. All statistical data were presented as Mean $\pm$ SD, and one-way analysis of variance (ANOVA) was used for data analysis, with ns indicating no statistically significant difference ( $P>0.5$ ).

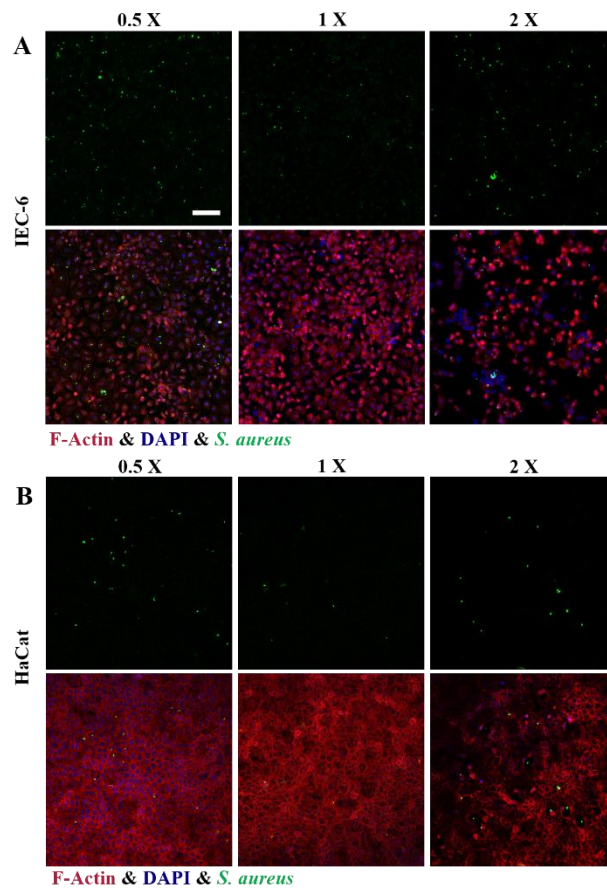

**Supplementary Figure 3.** Interactions between *Staphylococcus aureus* (*S. aureus*) expressing green fluorescent protein (GFP) and host cell monolayers of IEC-6 (A) or HaCat cell (B). Scale bar: 50  $\mu$ m.

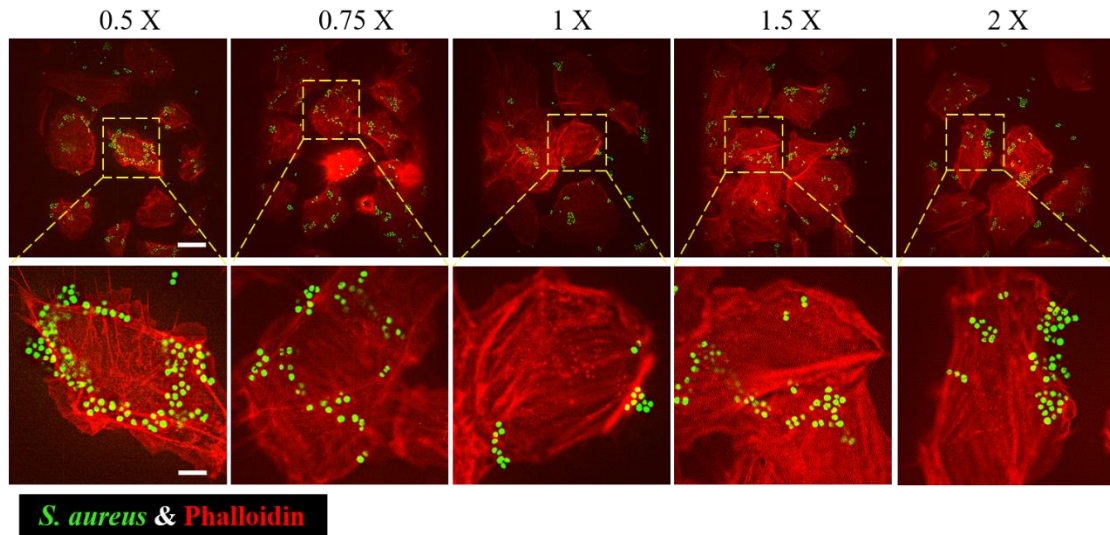

**Supplementary Figure 4.** Super-resolution imaging results of interactions between *S. aureus* and host cell (IEC-6) under the hypotonic (0.5X and 0.75X), isotonic (1X), and hypertonic (1.5X and 2X) conditions. The scale bars in the upper and lower panels were 20 and 5  $\mu$ m, respectively.

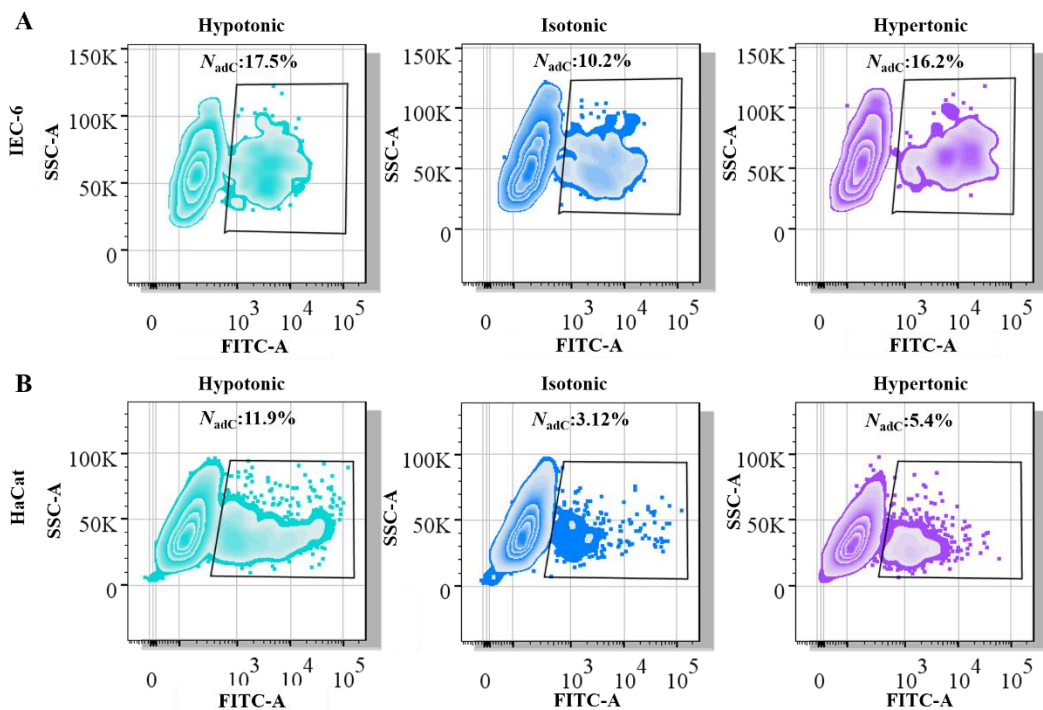

**Supplementary Figure 5.** Interactions between bacteria (*S. aureus*) and host cells including (A) IEC-6 cells and (B) HaCat cells, regulated with environmental osmotic pressures, where the host cells carrying bacteria, *i.e.*, the host cells to which bacteria

adhered and internalized, were quantified through the flow cytometry. The percentages of the host cells carrying bacteria were also presented in the images.

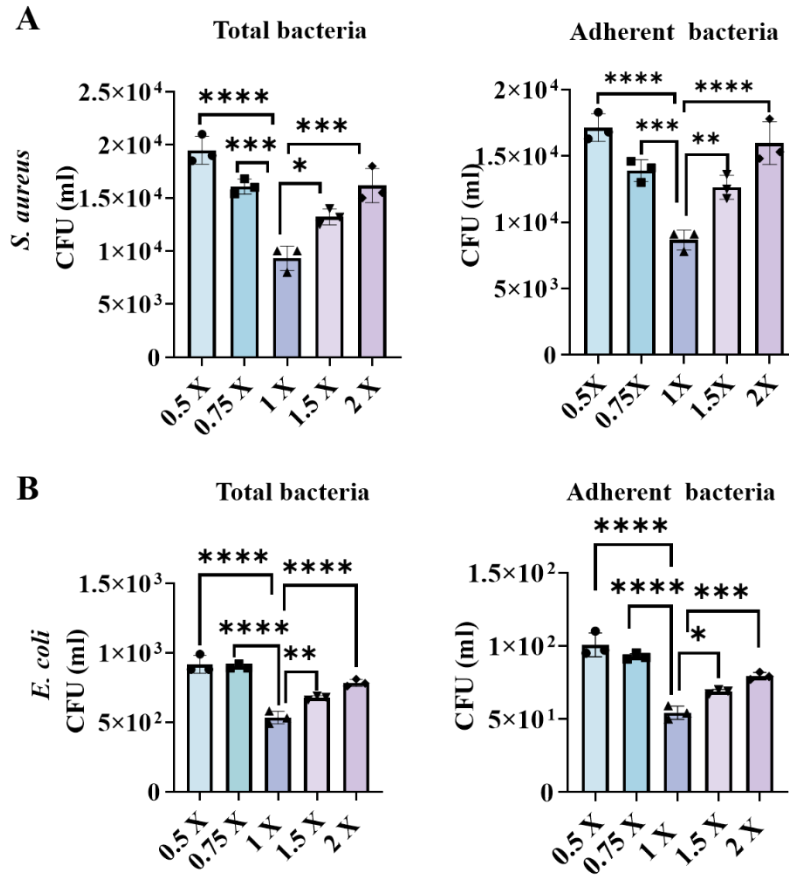

**Supplementary Figure 6.** Colony counts of bacteria that directly interacted with the host cells, including adherent bacteria and internalized bacteria (hereafter referred to as total bacteria) and purely adherent bacteria. (A) and (B) were the corresponding experimental results, in which the adopted bacteria were gram-positive bacterium *S. aureus* and gram-negative bacterium *E. coli*, respectively. In these experiments, the host cells were allowed to interact with GFP-expressing *S. aureus*. Then, they were rinsed three times with Dulbecco's phosphate buffered saline (DPBS) solution. To quantify the number of total bacteria that included adherent bacteria and internalized bacteria, the host cells harboring adherent and internalized bacteria were lysed with 1% Triton X-100 and subsequently serially diluted for analysis based on the flat colony counting method. On the other hand, the host cells were treated with 200  $\mu$ g/mL gentamicin to kill extracellularly adherent bacteria. In this way, one could determine the number of internalized bacteria. Further, the cells were lysed with 1% Triton X-100



and serially diluted for analysis using the same flat colony counting method. Finally, the purely adherent bacteria might be quantitatively estimated. At least three independent experiments were carried out for each specific experimental condition. All the statistical data were denoted as Mean±SD, and one-way analysis of variance (ANOVA) was employed in the data analyses with \*\* and \*\*\* indicating  $P < 0.01$  and  $P < 0.001$ , respectively.

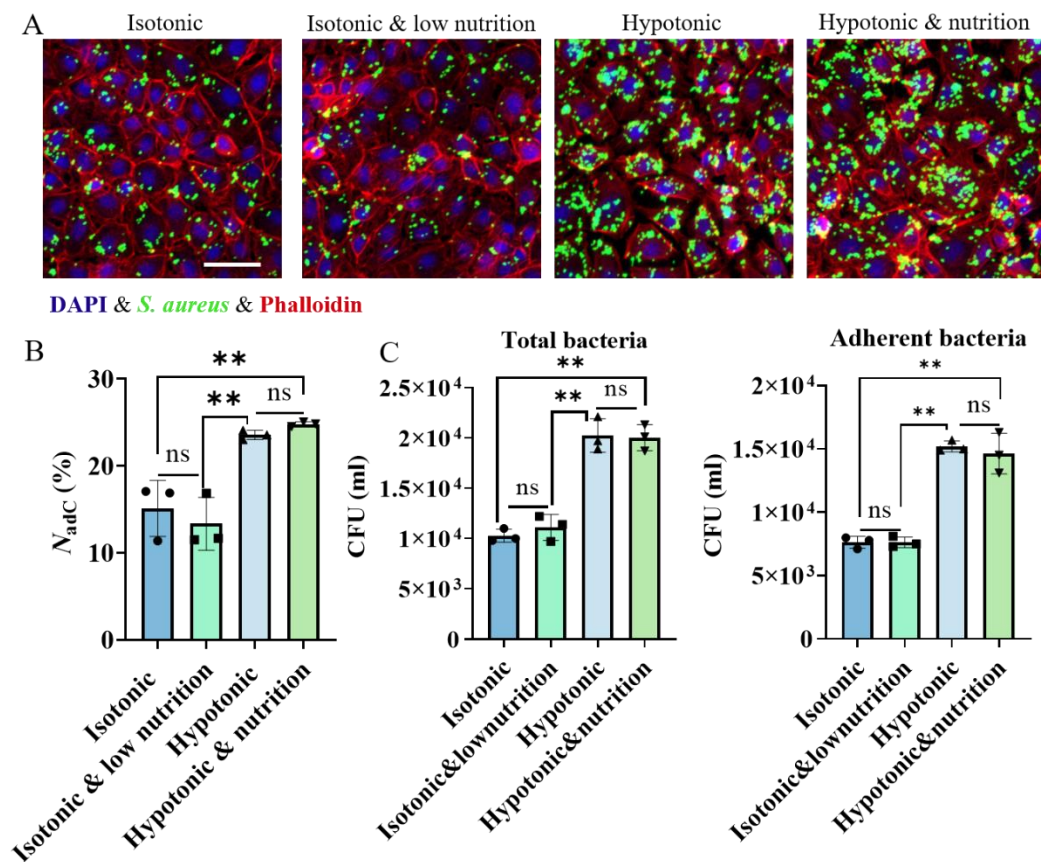

**Supplementary Figure 7.** Effect of nutrient levels on bacterial-host cell interactions under different nutrition and osmotic pressure (Isotonic, isotonic & low nutrition, hypotonic and hypotonic & normal nutrition). (A) Confocal imaging, (B) flow cytometry analysis and (C) bacterial colony counts, where the left image showed the statistical results of total bacteria whereas the right image presented those of adherent bacteria. All the statistical data were denoted as Mean±SD, and one-way analysis of

variance (ANOVA) was employed in the data analyses with \*\* and \*\*\* indicating  $P < 0.01$  and  $P < 0.001$ , respectively. Scale bar: 50  $\mu\text{m}$ .

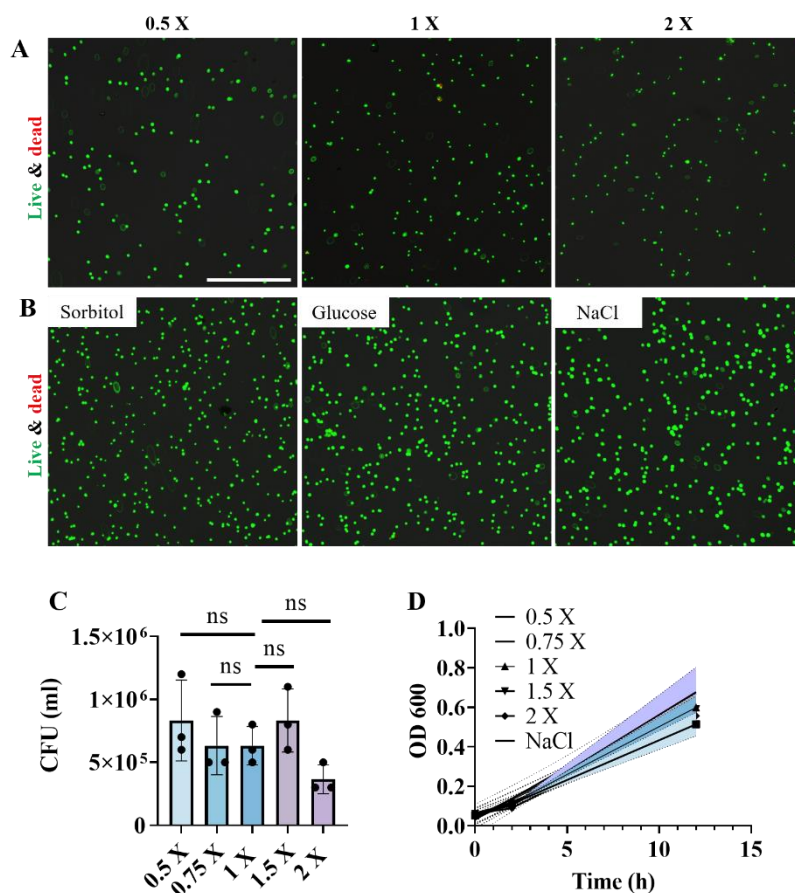

**Supplementary Figure 8.** Bacterial viability tests under different osmotic pressures. (A) Fluorescence images presenting the viability of *S. aureus*, where the live and dead bacteria were labelled as green and red by SYTO/PI dead-live double staining, respectively, after they were treated with hypotonic (0.5X, left), isotonic (1X, middle) and hypertonic (2X, right) solutions for 6 h. (B) Typical fluorescence images presenting the viability of *S. aureus* after they were treated with the hypertonic solutions prepared with sorbitol (left), glucose (middle) and NaCl (right), respectively. (C) Colony count-based statistical results of the bacteria treated with hypotonic (0.5X, 0.75X), isotonic (1X) and hypertonic (1.5X, 2X) solutions for 6 h, respectively. (D) Growth curves (OD 600) of the bacteria in the hypotonic (0.5X and 0.75X), isotonic (1X) and hypertonic (1.5X and 2X) solutions. All the statistical data were presented as Mean  $\pm$  SD from at least three independent experiments for each specific condition. Statistical analyses



based on one-way ANOVA were used in the experiments and \*, \*\*, \*\*\* and \*\*\*\* denoted  $P < 0.05$ ,  $P < 0.01$ ,  $P < 0.001$  and  $P < 0.0001$ , respectively. Scale bar: 100  $\mu\text{m}$ .

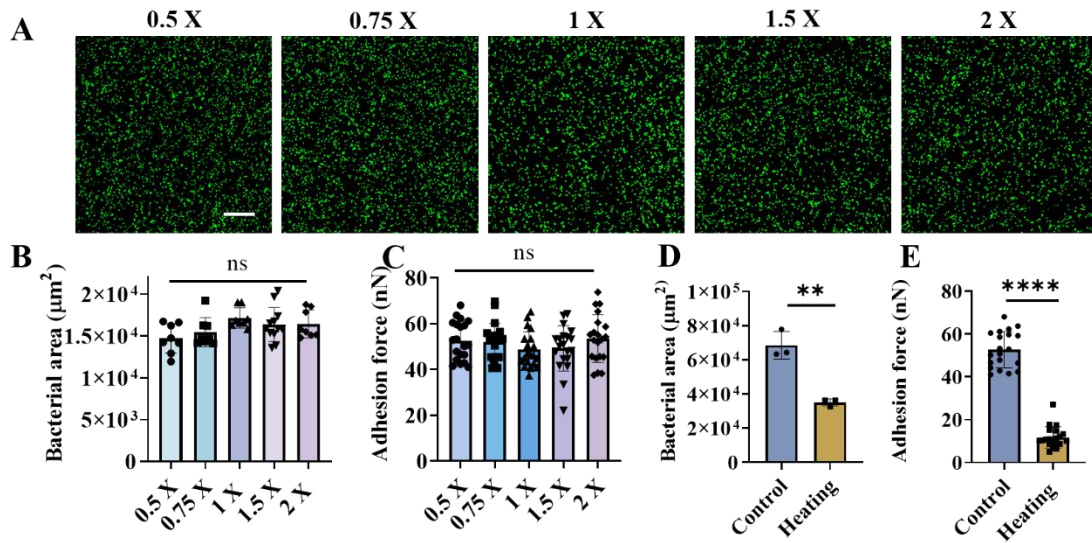

**Supplementary Figure 9.** Experimental results of bacterial adhesion to collagen-modified substrates under different osmotic pressures. In these experiments, bacteria (*S. aureus*) were added to collagen-modified substrates and then treated with the hypotonic (0.5X and 0.75X), isotonic (1X) and hypertonic (1.5X and 2X) solutions for 6 h, respectively. Subsequently, they were rinsed three times to remove the nonadherent bacteria and imaged with an inverted confocal laser scanning microscope (Nikon A1, Japan). (A) Typical Fluorescence images of bacterial adhesion to collagen-modified substrates under different osmotic pressures. (B) Bacterial adhesion areas under different osmotic pressures. (C) Adhesion forces between the bacteria and the underlying collagen-modified substrates under different osmotic pressures. (D) Comparison of bacterial adhesion area between unheated and heated treatments. (E) Comparison of adhesion force between unheated and heated treatments. All these statistical results were presented as Mean $\pm$ SD from at least three independent experiments for each specific condition. Statistical analyses based on one-way ANOVA were utilized in the experiments and \*, \*\*, \*\*\*and \*\*\*\* denoted  $P < 0.05$ ,  $P < 0.01$ ,  $P < 0.001$  and  $P < 0.0001$ , respectively. Scale bar 100  $\mu\text{m}$ .

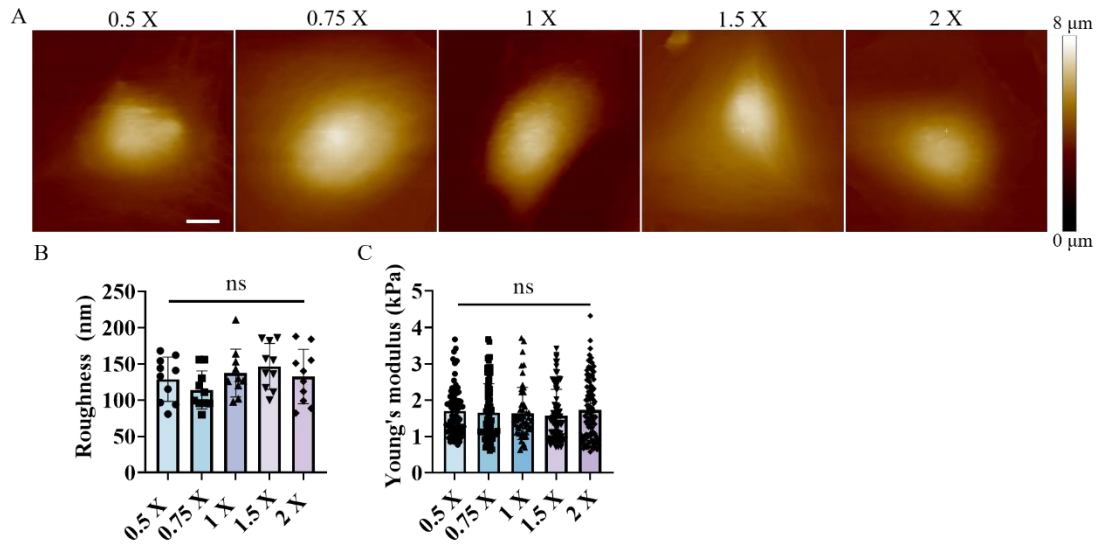

**Supplementary Figure 10.** Morphology, roughness and stiffness (Young's moduli) of the host cell (IEC-6) characterized by atomic force microscope (AFM), under different osmotic pressure (Hypotonic: 0.5X; 0.75X; Isotonic: 1X; Hypertonic: 1.5 X, 2X). Scale bar: 5μm.

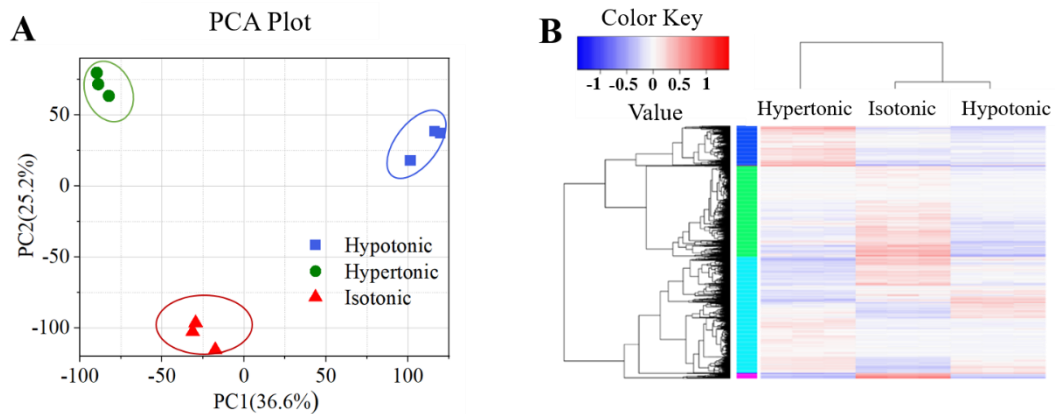

**Supplementary Figure 11.** RNA sequencing analysis were performed on host cells (IEC-6) treated with the hypotonic (0.5X), isotonic (1X) and hypertonic (2X) solutions, respectively. (A) Principal component analysis (PCA) results of the RNA sequencing data. (B) Cluster gram heat map. These data demonstrated that there were significantly up-regulated/down-regulated genes in the host cells under different osmotic pressures.

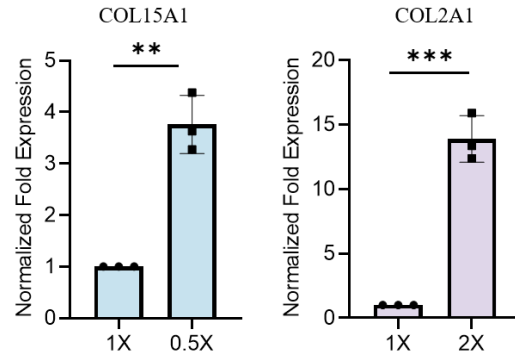

**Supplementary Figure 12.** The IEC-6 cells were treated with isotonic (1X), hypotonic (0.5X) and hypertonic (2X) solution, and the relative expression levels of the COL15A1 and COL2A1 genes were quantified by qPCR and normalized to that of GAPDH. Relative expression was calculated using the  $2^{-\Delta\Delta CT}$  method. Two-sided unpaired t test was used for statistical analysis. \*\*and\*\*\* indicated  $P < 0.01$  and  $P < 0.001$ , respectively.

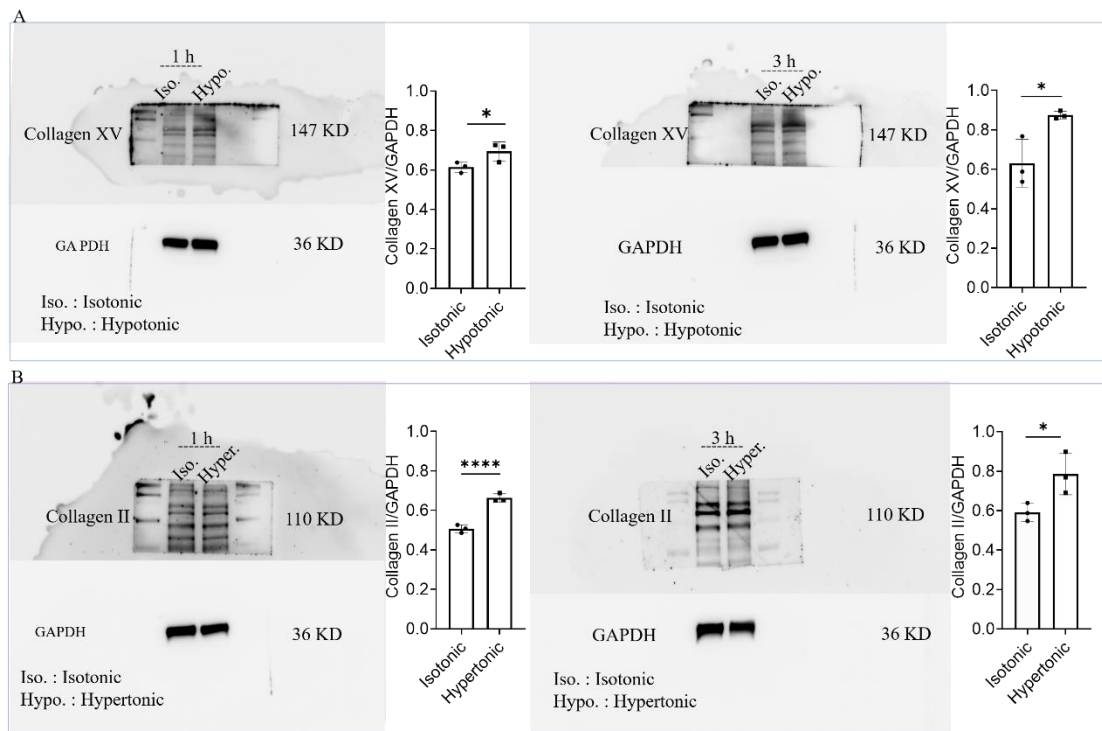

**Supplementary Figure 13.** Western blotting (WB) results for IEC-6 cells that were treated within hypotonic (A) and hypertonic (B) solution for 1 h and 3 h. Two-sided

unpaired t test was used for statistical analysis. \*and\*\*\*\* indicated  $P < 0.05$  and  $P < 0.0001$ , respectively.

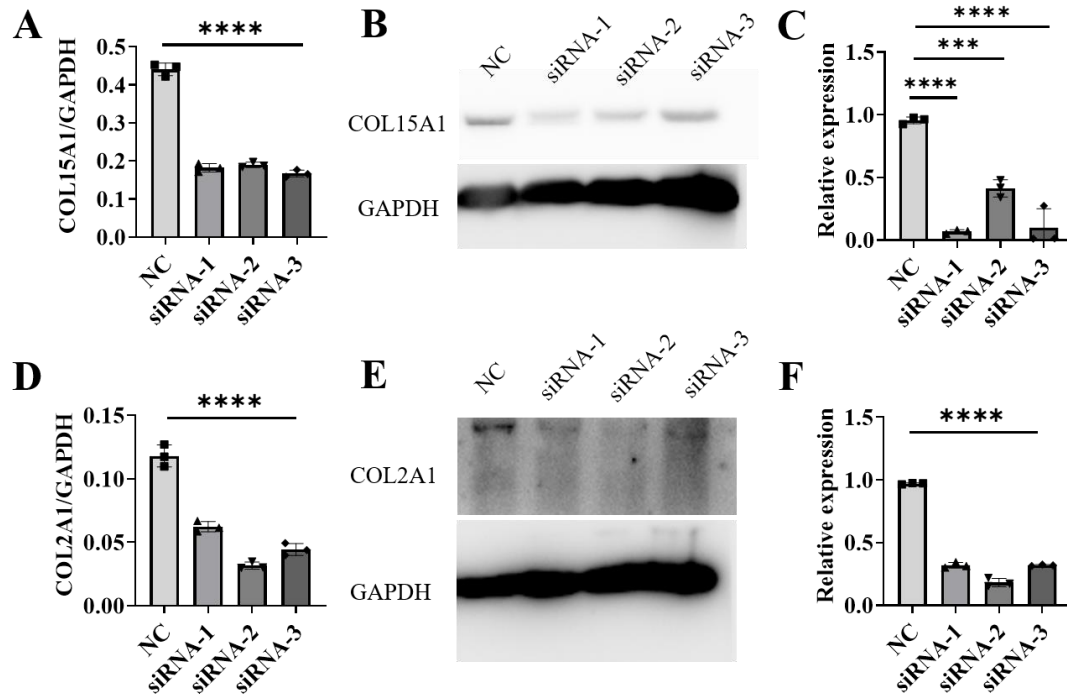

**Supplementary Figure 14.** Experiments on siRNA-mediated Knockdown of type XV and type II collagen in IEC-6 cells. (A) Relative expression of COL15A1 in the mRNA level. (B) Western blot (WB) and (C) the corresponding quantitative results for IEC-6 cells that were transfected with the designed siRNA sequences targeting COL15A1 or negative control (NC) siRNA. (D) Relative expression of COL2A1 in the mRNA level. (E) Western blot (WB) and (F) the corresponding quantitative results for IEC-6 cells that were transfected with the designed siRNA sequences targeting COL2A1 or negative control (NC) siRNA. All the statistical data were presented as Mean  $\pm$  SD from at least three independent experiments for each specific condition. Statistical analyses based upon one-way ANOVA were used in the experiments, and \*, \*\*, \*\*\* and \*\*\*\* indicated  $P < 0.05$ ,  $P < 0.01$ ,  $P < 0.001$  and  $P < 0.0001$ , respectively.

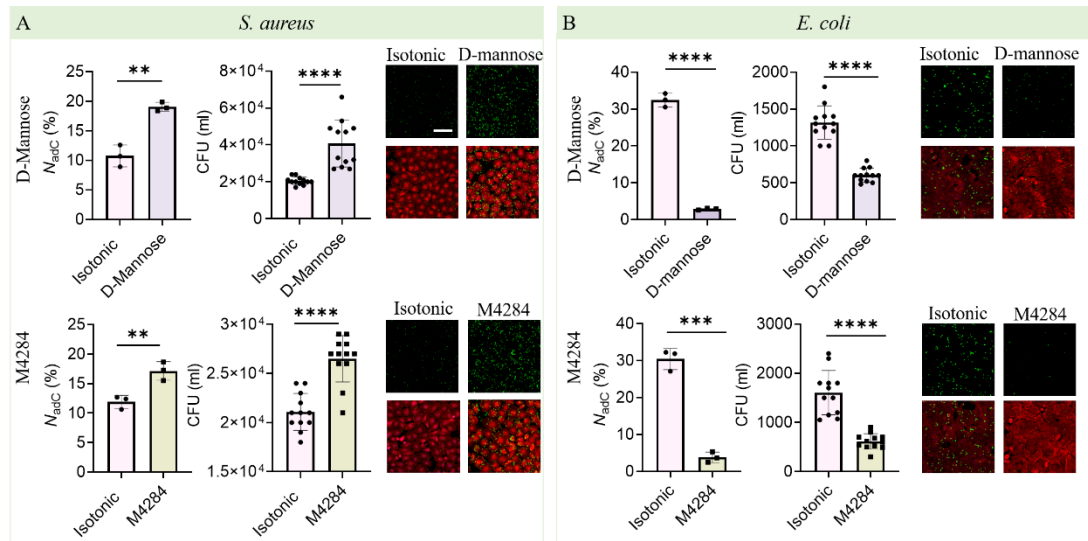

**Supplementary Figure 15.** (A) Infection of host cells by *S. aureus* in the presence of M4284 (10 $\mu$ M) or D-mannose (200 mM). (B) Infection of host cells by *E. coli* in the presence of M4284 (10 $\mu$ M) or D-mannose (200 mM). All statistical data are presented as Mean  $\pm$  SD, and one-way analysis of variance (ANOVA) was utilized for data analysis, with \*\*\*\* indicating  $P < 0.0001$ , respectively. Scale bar: 100  $\mu$ m.

**Supplementary Table 1.** Preparation of osmotic stimulation solutions with different osmotic pressures.

| <b>Experimental group</b> | <b>Reagent formula</b>                                            | <b>Measured osmotic pressure (mOsm kg<sup>-1</sup>)</b> |
|---------------------------|-------------------------------------------------------------------|---------------------------------------------------------|
| 0.5 X                     | Regular DMEM Medium <sup>[a]</sup> + ddH <sub>2</sub> O (v/v=1:1) | 168                                                     |
| 0.75 X                    | Regular DMEM Medium + ddH <sub>2</sub> O (v/v=2:1)                | 227                                                     |
| 1 X                       | Regular DMEM Medium                                               | 344                                                     |
| 1.5 X                     | Regular DMEM Medium + 30mg/ml mannitol                            | 499                                                     |
| 2 X                       | Regular DMEM Medium + 50mg/ml mannitol                            | 612                                                     |

<sup>[a]</sup> DMEM/High glucose produced by Hyclone (Cat No.: SH30243.01) was referred to as isotonic solution (1 X) in the experiments.



**Supplementary Table 2.** Preparation of culture media containing various nutrients in the hypotonic or isotonic solution.

| Experimental group                          | Isotonic           | Isotonic & low nutrition | hypotonic | Isotonic & normal nutrition |
|---------------------------------------------|--------------------|--------------------------|-----------|-----------------------------|
| Component description                       | mg/L               |                          |           |                             |
| Calcium chloride                            | 200                | 100                      | 100       | 200                         |
| Ferric nitrate 9H <sub>2</sub> O            | 0.1                | 0.05                     | 0.05      | 0.1                         |
| Potassium chloride                          | 400                | 200                      | 200       | 400                         |
| Magnesium sulfate                           | 97.6               | 48.8                     | 48.8      | 97.6                        |
| Sodium chloride                             | 6400               | 3200                     | 3200      | 6400                        |
| Sodium phosphate monobasic H <sub>2</sub> O | 125                | 62.5                     | 62.5      | 125                         |
| L-Arginine-HCl                              | 84                 | 42                       | 42        | 84                          |
| L-Cystine-2HCl                              | 62.5               | 31.25                    | 31.25     | 62.5                        |
| L-Glutamine                                 | 584                | 297                      | 297       | 584                         |
| Glycine                                     | 30                 | 15                       | 15        | 30                          |
| L-Histidine-HCl H <sub>2</sub> O            | 42                 | 21                       | 21        | 42                          |
| L-Isoleucine                                | 104.8              | 52.4                     | 52.4      | 104.8                       |
| L-Leucine                                   | 104.8              | 52.4                     | 52.4      | 104.8                       |
| L-Lysine-HCL                                | 146.3              | 73.1                     | 73.1      | 146.3                       |
| L-Methionine                                | 30                 | 15                       | 15        | 30                          |
| L-Phenylalanine                             | 66                 | 33                       | 33        | 66                          |
| L-Threonine                                 | 95.2               | 47.6                     | 47.6      | 95.2                        |
| L-Tryptophan                                | 16                 | 8                        | 8         | 16                          |
| L-Tyrosine-2Na-2H <sub>2</sub> O            | 103.7              | 51.85                    | 51.85     | 103.7                       |
| L-Valine                                    | 93.6               | 46.8                     | 46.8      | 93.6                        |
| FBS                                         | volume ratio (v/v) |                          |           |                             |
|                                             | 1%                 |                          |           |                             |

**Supplementary Table 3.** The number of significantly up-regulated and down-regulated genes in IEC-6 cells under the hypertonic and hypotonic conditions

| <b>Sample comparison</b> | <b>Up-regulated</b> | <b>Down-regulated</b> |
|--------------------------|---------------------|-----------------------|
| Hypotonic vs. Isotonic   | 2399                | 667                   |
| Hypertonic vs. Isotonic  | 2113                | 566                   |

**Supplementary Table 4.** Major genes significantly differentially expressed in the hypertonic condition.

| <b>GeneID</b>      | <b>log2Foldchange</b> | <b>pvalue</b> | <b>padj</b> | <b>Regulation</b> | <b>Genesymbol</b> |
|--------------------|-----------------------|---------------|-------------|-------------------|-------------------|
| ENSRNOG00000035596 | 9.691420003           | 4.45E-16      | 9.75E-15    | Ups               | Mir207            |
| ENSRNOG00000036703 | 9.623171199           | 7.30E-16      | 1.56E-14    | Ups               | Itgax             |
| ENSRNOG00000050714 | 9.546842231           | 1.25E-15      | 2.59E-14    | Ups               | Islr2             |
| ENSRNOG00000012034 | 9.506498986           | 1.65E-15      | 3.39E-14    | Ups               | Ces2i             |
| ENSRNOG00000019404 | 9.41626847            | 3.00E-15      | 15.97E-14   | Ups               | Hhatl             |
| ENSRNOG00000012719 | 9.413728394           | 3.91E-15      | 7.65E-14    | Ups               | Tdrd12            |
| ENSRNOG00000027940 | 9.354837022           | 1.41E-116     | 5.74E-14    | Ups               | Plppr3            |
| ENSRNOG00000033173 | 9.215361257           | 1.13E-09      | 1.17E-08    | Ups               | Fam71e2           |
| ENSRNOG00000019390 | 9.189606725           | 1.62E-14      | 2.97E-13    | Ups               | Klhl40            |
| ENSRNOG00000021199 | 9.103956049           | 3.44E-14      | 6.10E-13    | Ups               | Fcgr1a            |
| ENSRNOG00000007044 | 8.987641701           | 7.11E-14      | 1.23E-12    | Ups               | L3mbtl1           |
| ENSRNOG00000058560 | 8.686272396           | 5.64E-13      | 8.96E-12    | Ups               | Col2a1            |
| ENSRNOG00000017209 | 8.662582869           | 6.90E-13      | 1.08E-11    | Ups               | Tubb3             |
| ENSRNOG00000018434 | 8.634353176           | 7.76E-13      | 1.21E-11    | Ups               | Stab1             |
| ENSRNOG00000042847 | 8.540575704           | 2.21E-12      | 3.22E-11    | Ups               | LOC687707         |
| ENSRNOG00000000335 | 8.488855347           | 2.52E-12      | 3.66E-11    | Ups               | Ermapp            |
| ENSRNOG00000019728 | 8.458008602           | 3.83E-12      | 5.42E-11    | Ups               | Itgam             |
| ENSRNOG00000004630 | 8.426234866           | 3.30E-12      | 4.72E-11    | Ups               | Rag1              |
| ENSRNOG00000016703 | 8.286082695           | 1.12E-11      | 1.51E-10    | Ups               | Gtf2a11           |
| ENSRNOG00000019486 | 8.285997838           | 8.83E-12      | 1.21E-10    | Ups               | Trpv1             |

**Supplementary Table 5.** Major genes significantly differentially expressed in the hypotonic condition.

| <b>GeneID</b>      | <b>log2Foldchange</b> | <b>pvalue</b> | <b>padj</b> | <b>Regulation</b> | <b>Genesymbol</b> |
|--------------------|-----------------------|---------------|-------------|-------------------|-------------------|
| ENSRNOG00000010278 | 9.321691              | 8.14E-14      | 8.14E-14    | Ups               | Il6               |
| ENSRNOG00000016073 | 8.961566              | 1.02E-12      | 1.02E-12    | Ups               | Taar1             |
| ENSRNOG00000049191 | 8.555186              | 1.42E-11      | 1.42E-11    | Ups               | Olr1159           |
| ENSRNOG00000007640 | 8.189205              | 1.50E-10      | 1.50E-10    | Ups               | Npbwr1            |
| ENSRNOG00000046763 | 7.711738              | 1.60E-06      | 1.60E-06    | Ups               | Adssl1            |
| ENSRNOG00000017209 | 7.687042              | 4.35E-09      | 4.35E-09    | Ups               | Tubb3             |
| ENSRNOG00000027030 | 7.506298              | 3.68E-56      | 3.68E-56    | Ups               | Adm               |
| ENSRNOG00000003300 | 7.328737              | 2.52E-170     | 5.21E-168   | Ups               | Btg2              |
| ENSRNOG00000009919 | 7.191162              | 6.46E-08      | 6.46E-08    | Ups               | Acod1             |
| ENSRNOG00000059956 | 6.956704              | 3.41E-07      | 3.41E-07    | Ups               | Bcl6b             |
| ENSRNOG00000003104 | 6.945858              | 3.91E-07      | 3.91E-07    | Ups               | Trpv2             |
| ENSRNOG00000008015 | 6.741163              | 0             | 0           | Ups               | Fos               |
| ENSRNOG00000060381 | 6.003268              | 5.81E-05      | 5.81E-05    | Ups               | Col15a1           |
| ENSRNOG00000005082 | 5.992952              | 1.89E-07      | 1.89E-07    | Ups               | Irf6              |
| ENSRNOG00000009822 | 5.975929              | 1.13E-05      | 1.13E-05    | Ups               | Tlr2              |
| ENSRNOG00000022884 | 5.960116              | 7.52E-05      | 7.52E-05    | Ups               | Cd84              |
| ENSRNOG00000012509 | 5.954869              | 1.54E-05      | 1.54E-05    | Ups               | Il17f             |
| ENSRNOG00000006579 | 5.941042              | 3.75E-07      | 3.75E-07    | Ups               | Reg3g             |
| ENSRNOG00000021318 | 5.933944              | 6.26E-05      | 6.26E-05    | Ups               | Epas1             |
| ENSRNOG00000047511 | 5.929741              | 7.71E-05      | 7.71E-05    | Ups               | Olr1381           |

**Supplementary Table 6.** List of primer sequences designed for qPCR.

| <b>Target Gene</b> |                | <b>Sequence(5'—3')</b> |
|--------------------|----------------|------------------------|
| COL15A1            | Forward primer | GCCCCCTACTTCATCCTCTC   |
|                    | Reverse primer | CAGTACGGACCTCCAGGGTA   |
| COL2A1             | Forward primer | ACGCTCAAGTCGCTGAACAA   |
|                    | Reverse primer | TCAATCCAGTAGTCTCCGCTCT |
| GAPDH              | Forward primer | CCGCATCTTCTTGTGCAGTG   |
|                    | Reverse primer | CGATACGGCCAAATCCG TTC  |

**Supplementary Table 7.** List of siRNA sequences designed in the experiments.

| Species           | Target Gene      | Name |           | Sequence(5'—3')                |
|-------------------|------------------|------|-----------|--------------------------------|
| Rattus norvegicus | COL15A1          | Si-1 | sense     | GCU CAU UGG UGU CCC<br>AUU ATT |
|                   |                  |      | antisense | UAA UGG GAC ACC AAU<br>GAG CTT |
|                   |                  | Si-2 | sense     | GGA AGU AGA CAU GCU<br>GGA UTT |
|                   |                  |      | antisense | AUC CAG CAU GUC UAC<br>UUC CTT |
|                   |                  | Si-3 | sense     | GCC UAA AGA AGC ACA<br>CGU UTT |
|                   |                  |      | antisense | AAC GUG UGC UUC UUU<br>AGG CTT |
|                   | COL2A1           | Si-1 | sense     | GCU GGU GCA CAA GGU<br>CCU ATT |
|                   |                  |      | antisense | GCU GGU GCA CAA GGU<br>CCU ATT |
|                   |                  | Si-2 | sense     | UAG GAC CUU GUG CAC<br>CAG CTT |
|                   |                  |      | antisense | GCU CAU CCA GGG CUC<br>CAA UTT |
|                   |                  | Si-3 | sense     | GGG UGA AGG UGG AAA<br>GCA ATT |
|                   |                  |      | antisense | UUG CUU UCC ACC UUC<br>ACC CTT |
|                   | Negative control |      | sense     | UUC UCC GAA CGU GUC<br>ACG UTT |
|                   |                  |      | antisense | ACG UGA CAC GUU CGG<br>AGA ATT |



**Supplementary Table 8.** Preparation of osmotic stimulation solution based on the FimH antagonist (M4284 and D-mannose).

| Component         | Concentration             | Osmotic pressure<br>(mOsm/kg) |
|-------------------|---------------------------|-------------------------------|
| DMEM/High glucose |                           | 344                           |
| M4284             | 10 $\mu$ M <sup>1-3</sup> | 425                           |
| D-mannose         | 1mM <sup>2</sup>          | 355                           |
| D-mannose         | 200mM <sup>4</sup>        | 508                           |

#### Supplementary References

1. Spaulding, C. N. et al. Selective depletion of uropathogenic E. coli from the gut by a FimH antagonist. *Nature* 546, 528-532 (2017).
2. Tomasek, K. et al. Type 1 piliated uropathogenic Escherichia coli hijack the host immune response by binding to CD14. *eLife* 11, e78995 (2022).
3. Han, Z. et al. Lead Optimization Studies on FimH Antagonists: Discovery of Potent and Orally Bioavailable Ortho-Substituted Biphenyl Mannosides. *Journal of Medicinal Chemistry* 55, 3945-3959 (2012).
4. Plescher, M., Teleman, A. A. & Demetriades, C. TSC2 mediates hyperosmotic stress-induced inactivation of mTORC1. *Scientific Reports* 5, 1-12(2015).
